# Supplementary material for: The Transcriptional Repressor Gfi1 Plays a Critical Role in the Development of NKT1- and NKT2-Type iNKT Cells
Source: PubMed Central journal article supplement (PMC4902269; doi:10.1371/journal.pone.0157395), 2016-06-10

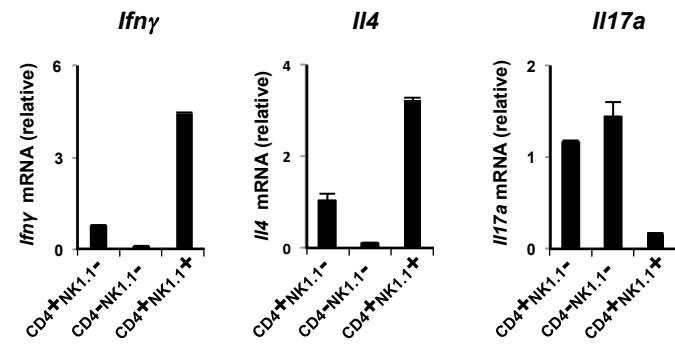

Supplement: pone.0157395.s004.pdf [file pone.0157395.s004.pdf]
